# Supplementary material
Source: Royal Society of Chemistry journal article supplement (https://www.rsc.org/suppdata/dt/1999/4419/906494j.doc)
Supplement: Supplementary file 1 [file 906494j.doc]

**Chemistry of Thiocarboxylates: Synthesis and NMR (113Cd and 199Hg) Spectra of Thioacetate Complexes of Group 12 metals. Structures of (Ph4P) [Zn(SC{O}Me)3 (H2O)] and of (Ph4P) [Cd(SC{O}Me)3].**

______________________________________________________________

Jeyagowry T. Sampanthar,a Theivanayagam C. Deivaraj,a Jagadese J. Vittal*a and

Philip A.W. Dean*b

a *Department of Chemistry, National University of Singapore, Lower Kent Ridge Road,*

*Singapore 119 260. E-mail: chmjjv@nus.edu.sg*

*b Department of Chemistry, University of Western Ontario, London, Canada N6A 5B7.*

*E-mail: pawdean@julian.uwo.ca*

***Supporting Materials:***

Table S1. **113Cd Titration Data**

Table S1. **113Cd Titration Data**

[Cd(SC{O}Me)3]:H2O in CH2Cl2 at 294 K*a*

H2O/Cd Cd*b*

0 0

0.50 7.3

1.00 14.8

2.06 27.8

[Cd(SC{O}Me)3]:DMSO in CH2Cl2 at 178 K*a*

DMSO/Cd Cd*b*

0 0

0.50 14.6

1.00 28.5

2.00 50.8

3.50 67.8

5.00 80.4

[Cd(SC{O}Me)3]:DMF in CH2Cl2 at 178 K*a*

DMF/Cd Cd*b*

0 0

0.50 4.1

1.00 9.3

2.00 15.1

3.50 23.7

5.00 35.4

*a* For **2**, 0.10 mol/L of CH2Cl2 at RT

*b* Cd = Cd([Cd(SC{O}Me)3(L)])  Cd([Cd(SC{O}Me)3])
